# Supplementary material
Source: publisher figshare collection journal article supplement (https://sage.figshare.com/ndownloader/files/13314401)
Supplement: Supplementary file 1 [file 13314401]

## Supplementary information tables 1: Moose checklist

| Recommendation                                                                                                    | Reported on (page no. of published paper)                |
|-------------------------------------------------------------------------------------------------------------------|----------------------------------------------------------|
| <b>Reporting of background should include</b>                                                                     |                                                          |
| Problem definition                                                                                                | 1; Introduction                                          |
| Hypothesis statement                                                                                              | 1; Introduction                                          |
| Description of study outcome(s)                                                                                   | 2; Studies considered and search strategy                |
| Type of exposure or intervention used                                                                             | 2; Studies considered and search strategy                |
| Type of study designs used                                                                                        | 2; Studies considered and search strategy                |
| Study population                                                                                                  | 2; Studies considered and search strategy                |
| <b>Reporting of search strategy should include</b>                                                                |                                                          |
| Qualifications of searchers (e.g., librarians and investigators)                                                  | 2; Studies considered and search strategy                |
| Search strategy, including time period included in the synthesis and keywords                                     | 2; Studies considered and search strategy                |
| Effort to include all available studies, including contact with authors                                           | 2; Studies considered and search strategy                |
| Databases and registries searched                                                                                 | 2; Studies considered and search strategy                |
| Search software used, name and version, including special features used (e.g., explosion)                         | NA                                                       |
| Use of hand searching (e.g., reference lists of obtained articles)                                                | 2; Studies considered and search strategy                |
| List of citations located and those excluded, including justification                                             | 3; Figure 1                                              |
| Method of addressing articles published in languages other than English                                           | NA                                                       |
| Method of handling abstracts and unpublished studies                                                              | 2; Studies considered and search strategy                |
| Description of any contact with authors                                                                           | 2; Studies considered and search strategy                |
| <b>Reporting of methods should include</b>                                                                        |                                                          |
| Description of relevance or appropriateness of studies assembled for assessing the hypothesis to be tested        | 2; Studies considered and search strategy, study quality |
| Rationale for the selection and coding of data (e.g., sound clinical principles or convenience)                   | NA                                                       |
| Documentation of how data were classified and coded (e.g., multiple raters, blinding, and interrater reliability) | 2; Study quality                                         |
| Assessment of confounding (e.g., comparability of cases and controls in studies where appropriate)                | 2; Study quality                                         |

|                                                                                                                                                                                                                                                                                |                                                                 |
|--------------------------------------------------------------------------------------------------------------------------------------------------------------------------------------------------------------------------------------------------------------------------------|-----------------------------------------------------------------|
| Assessment of study quality, including blinding of quality assessors; stratification or regression on possible predictors of study results                                                                                                                                     | 2; Study quality                                                |
| Assessment of heterogeneity                                                                                                                                                                                                                                                    | 2; Statistical analyses                                         |
| Description of statistical methods (e.g., complete description of fixed or random effects models, justification of whether the chosen models account for predictors of study results, dose-response models, or cumulative meta-analysis) in sufficient detail to be replicated | 2; Statistical analyses                                         |
| Provision of appropriate tables and graphics                                                                                                                                                                                                                                   | 3-11; Results                                                   |
| <b>Reporting of results should include</b>                                                                                                                                                                                                                                     |                                                                 |
| Graphic summarizing individual study estimates and overall estimate                                                                                                                                                                                                            | 3-11; Results                                                   |
| Table giving descriptive information for each study included                                                                                                                                                                                                                   | 4-5; Table 1                                                    |
| Results of sensitivity testing (e.g., subgroup analysis)                                                                                                                                                                                                                       | 19; Sensitivity analyses, supplementary table 5                 |
| Indication of statistical uncertainty of findings                                                                                                                                                                                                                              | Yes, presented as CIs in all results and figures                |
| <b>Reporting of discussion should include</b>                                                                                                                                                                                                                                  |                                                                 |
| Quantitative assessment of bias (e.g., publication bias)                                                                                                                                                                                                                       | 10-11; Discussion: Statistical analysis & Methodological issues |
| Justification for exclusion (e.g., exclusion of non-English-language citations)                                                                                                                                                                                                | Not reported                                                    |
| Assessment of quality of included studies                                                                                                                                                                                                                                      | 11-12; Discussion: Methodological issues                        |
| <b>Reporting of conclusions should include</b>                                                                                                                                                                                                                                 |                                                                 |
| Consideration of alternative explanations for observed results                                                                                                                                                                                                                 | 11-12; Methodological issues & Causality                        |
| Generalization of the conclusions (i.e., appropriate for the data presented and within the domain of the literature review)                                                                                                                                                    | 13; Clinical implications                                       |
| Guidelines for future research                                                                                                                                                                                                                                                 | 13; Clinical implications                                       |
| Disclosure of funding source                                                                                                                                                                                                                                                   | 14; Funding                                                     |

From: Stroup DF, Berlin JA, Morton SC, et al. (2000) Meta-analysis of observational studies in epidemiology: a proposal for reporting. Meta-analysis Of Observational Studies in Epidemiology (MOOSE) group. JAMA 283: 2008-2012.

### **Supplementary information tables 2 – 6**

#### **Supplementary information table 2: Risk of pneumonia with individual antipsychotic drugs compared to no exposure**

| Antipsychotic  | No of studies | RR (95% Confidence Intervals) | Weight (%) | I <sup>2</sup> (%) |
|----------------|---------------|-------------------------------|------------|--------------------|
| Amisulpride    | 1             | 1.14 (0.79 to 1.65)           | 5.6        | NA                 |
| Chlorpromazine | 1             | 1.10 (0.68 to 1.78)           | 4.8        | NA                 |
| Clozapine      | 2             | 3.12 (2.59 to 3.74)           | 11         | 0                  |
| Haloperidol    | 2             | 2.75 (1.48 to 5.12)           | 10.7       | 78                 |
| Olanzapine     | 3             | 2.16 (1.51 to 3.09)           | 13.5       | 45.1               |
| Pipamperone    | 1             | 1.55 (0.99 to 2.42)           | 5.07       | NA                 |
| Quetiapine     | 2             | 1.79 (1.40 to 2.29)           | 12.3       | 33.2               |
| Risperidone    | 3             | 1.86 (1.17 to 2.96)           | 16.6       | 81.3               |
| Sulpiride      | 1             | 1.29 (0.94 to 1.77)           | 6          | NA                 |
| Zotepine       | 2             | 1.50 (1.20 to 1.90)           | 11.5       | 0                  |
| Zuclopenthixol | 1             | 2.25 (1.00 to 5.07)           | 2.9        | NA                 |
| Overall        | 3             | 1.88 (1.57 to 2.25)           | 100        | 81.2               |

### **Supplementary information table 3: Consensus Newcastle-Ottawa Scale (NOS) Case controlled studies**

| Case controlled studies | Case definition | Selection          |                       |                        | Comparability     |                   | Exposure      |        |                   |
|-------------------------|-----------------|--------------------|-----------------------|------------------------|-------------------|-------------------|---------------|--------|-------------------|
|                         |                 | Representativeness | Selection of controls | Definition of controls | Comparability (a) | Comparability (b) | Ascertainment | Method | Non-response rate |
| Kuo et al (2013)        | 0               | 1                  | 1                     | 0                      | 1                 | 1                 | 0             | 1      | 1                 |
| Yang et al (2013)       | 0               | 1                  | 1                     | 0                      | 1                 | 1                 | 0             | 1      | 1                 |
| Gau et al (2010)        | 1               | 1                  | 1                     | 1                      | 1                 | 1                 | 0             | 1      | 1                 |
| Trifirò et al (2010)    | 1               | 1                  | 1                     | 1                      | 1                 | 1                 | 0             | 1      | 1                 |



|                      |   |   |   |   |   |   |   |   |   |
|----------------------|---|---|---|---|---|---|---|---|---|
| Jackson et al (2015) | 1 | 1 | 0 | 0 | 1 | 1 | 1 | 1 | 0 |
|----------------------|---|---|---|---|---|---|---|---|---|

Note: A study can be awarded a maximum of one star for each numbered item within the Selection and Outcome categories. A maximum of two stars can be given for Comparability.

## **Supplementary information table 5: Sensitivity analyses**

### **A: Sensitivity analysis on variations of the primary analysis**

| <b>Comparison</b>                                          | <b>No of studies</b> | <b>RR</b> | <b>95% Confidence Interval</b> | <b>I<sup>2</sup> (%)</b> |
|------------------------------------------------------------|----------------------|-----------|--------------------------------|--------------------------|
| <i>DerSimonian &amp; Laird CIs in studies of pneumonia</i> |                      |           |                                |                          |
| SGA vs no SGA                                              | 6                    | 1.93      | 1.65 to 2.26                   | 44.7                     |
| FGA vs no FGA                                              | 5                    | 1.70      | 1.44 to 2.00                   | 45.8                     |
| FGA vs SGA                                                 | 7                    | 1.07      | 0.90 to 1.28                   | 50.2                     |
| Antipsychotic exposure vs no exposures                     | 2                    | 2.02      | 1.08 to 3.77                   | 63.2                     |
| Individual antipsychotic                                   | 11*                  | 1.88      | 1.57 to 2.25                   | 81.2                     |
| <i>Excluding self-control case series</i>                  |                      |           |                                |                          |
| SGA vs no SGA excluding SCCS                               | 5                    | 2.11      | 1.54 to 2.88                   | 46.5                     |
| <i>DerSimonian &amp; Laird CIs in studies of mortality</i> |                      |           |                                |                          |
| Antipsychotic exposure vs no exposure                      | 4 <sup>§</sup>       | 1.50      | 1.05 to 2.14                   | 51.0                     |

\*Number of Individual antipsychotic from 3 studies; <sup>§</sup> Number of comparisons from 2 studies

**B: Sensitivity analysis removing each study in turn in SGA vs no SGA analysis**

| <b>Study omitted</b> | <b>Estimate</b> | <b>95% Confidence interval</b> |      |
|----------------------|-----------------|--------------------------------|------|
| Kuo et al (2013)     | 2.10            | 1.69                           | 2.63 |
| Yang et al (2013)    | 1.92            | 1.60                           | 2.31 |
| Gau et al (2010)     | 1.92            | 1.63                           | 2.28 |
| Trifiro et al (2010) | 1.88            | 1.61                           | 2.20 |
| Knol et al (2008)    | 1.79            | 1.61                           | 1.98 |
| Pratt et al (2011)   | 2.11            | 1.69                           | 2.62 |
| <b>Combined</b>      | 1.93            | 1.65                           | 2.26 |

**C: Sensitivity analysis removing each study in turn in FGA vs no FGA analysis**

| <b>Study omitted</b> | <b>Estimate</b> | <b>95% Confidence interval</b> |      |
|----------------------|-----------------|--------------------------------|------|
| Kuo et al (2013)     | 1.75            | 1.45                           | 2.09 |
| Yang et al (2013)    | 1.57            | 1.39                           | 1.78 |
| Trifiro et al (2010) | 1.68            | 1.38                           | 2.06 |
| Knol et al (2008)    | 1.76            | 1.43                           | 2.16 |
| Pratt et al (2011)   | 1.72            | 1.36                           | 2.19 |
| <b>Combined</b>      | 1.69            | 1.44                           | 2.00 |

**D: Sensitivity analysis removing each study in turn in FGA vs SGA analysis**

| <b>Study omitted</b>     | <b>Estimate</b> | <b>95% Confidence interval</b> |      |
|--------------------------|-----------------|--------------------------------|------|
| Aparasu et al (2013)     | 1.04            | 0.85                           | 1.28 |
| Huybrechts et al (2012)  | 1.05            | 0.86                           | 1.27 |
| Wang et al (2007)        | 1.14            | 0.96                           | 1.36 |
| Trifiro et al (2010)     | 1.11            | 0.93                           | 1.32 |
| Huybrechts et al (2011)  | 1.08            | 0.88                           | 1.32 |
| Dharmarajan et al (2011) | 1.08            | 0.86                           | 1.37 |
| Jackson et al (2015)     | 1.02            | 0.87                           | 1.20 |
| <b>Combined</b>          | 1.07            | 0.90                           | 1.28 |

## **Supplementary information table 6: Database searches**

### **Database: Embase <1974 to 2016 Week 18>**

Search Strategy:

---

- 1 \*pneumonia/ (43195)
- 2 \*neuroleptic agent/ (28232)
- 3 1 and 2 (28)
- 4 exp pneumonia/ (229474)
- 5 2 and 4 (105)
- 6 from 5 keep 1,3-6,8,11-13,16,19-20,22,24-25,27-29,33,38,40-41,43,45,47,50,54,57-58,61,67,69 (32)

### **Database: Epub Ahead of Print, In-Process & Other Non-Indexed Citations, Ovid MEDLINE(R) Daily and Ovid MEDLINE(R) <1946 to April 2016>**

Search Strategy:

---

- 1 \*Antipsychotic Agents/ (33153)
- 2 exp Pneumonia/ (80258)
- 3 1 and 2 (43)
- 4 from 3 keep 1,4-7,9-14,17-23,26-28,31,41 (23)

**Database: PubMed, Inception to April 2016**

| <b>Search</b> | <b>Query</b>                                                            | <b>Items found</b> |
|---------------|-------------------------------------------------------------------------|--------------------|
| #1            | ("Antipsychotic Agents"[Mesh]) AND "Pneumonia, Aspiration"[Mesh]        | 13                 |
| #2            | ("Pneumonia, Bacterial"[Mesh]) AND "Antipsychotic Agents"[Mesh]         | 5                  |
| #3            | (#1 or #2)                                                              | 18                 |
| #4            | Antipsychotic and pneumonia Filters:<br>Observational Study             | 0                  |
| #5            | Antipsychotic and pneumonia Schema: all filters:<br>Observational Study | 0                  |
| #6            | Antipsychotic and pneumonia                                             | 199                |
| #7            | (#3 or #6)                                                              | 199                |
| #8            | From #7 Select 19 document(s)                                           | 19                 |
